# Supplementary material for: N6-Methyladenine Progressively Accumulates in Mitochondrial DNA during Aging
Source: MDPI journal article supplement (doi:10.3390/ijms241914858), 2023-10-03
Supplement: s1 [file s1]

## Supplementary materials

### Extended Figure S1.

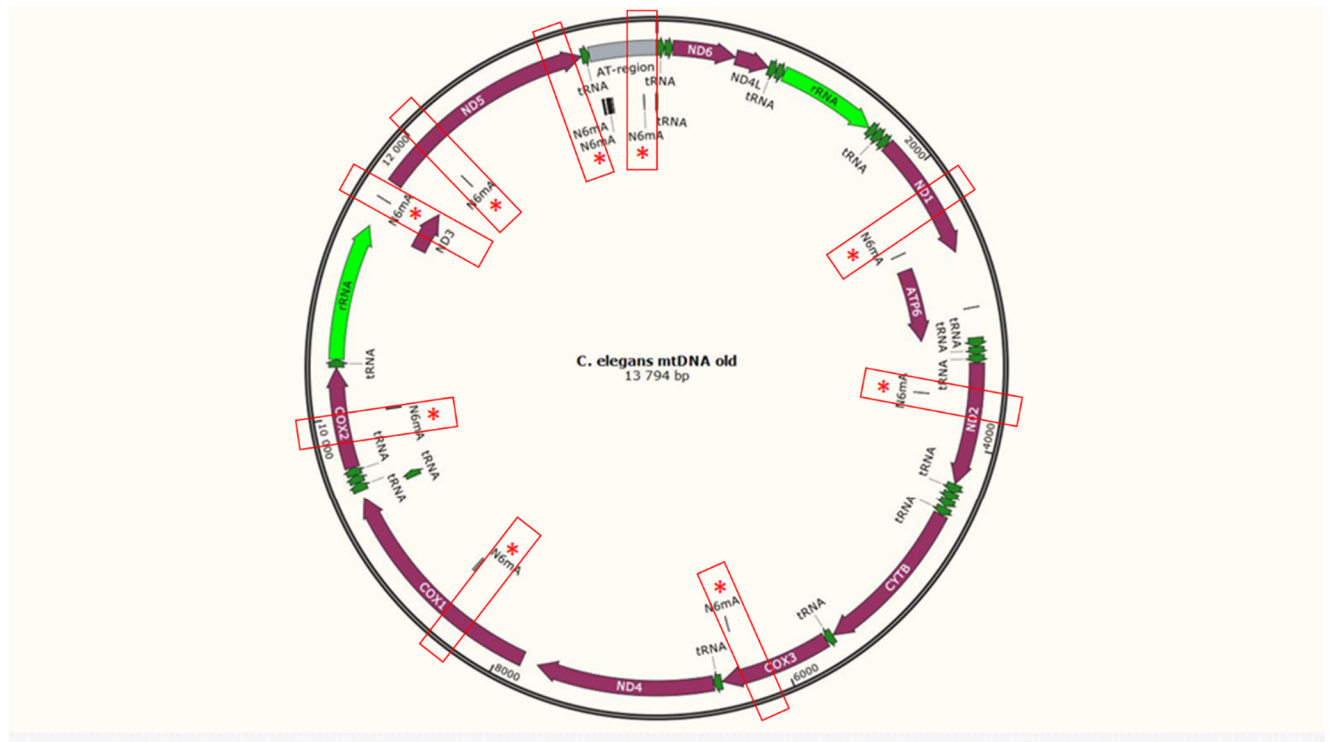

**Extended Figure S1. SMRT sequencing identified 6mA sites in the *C. elegans* mitochondrial genome isolated at the adult stage of day 5. 6mA sites are indicated by red asterisks. These sites scatter almost evenly along the mtDNA.**

**Extended Figure S2.**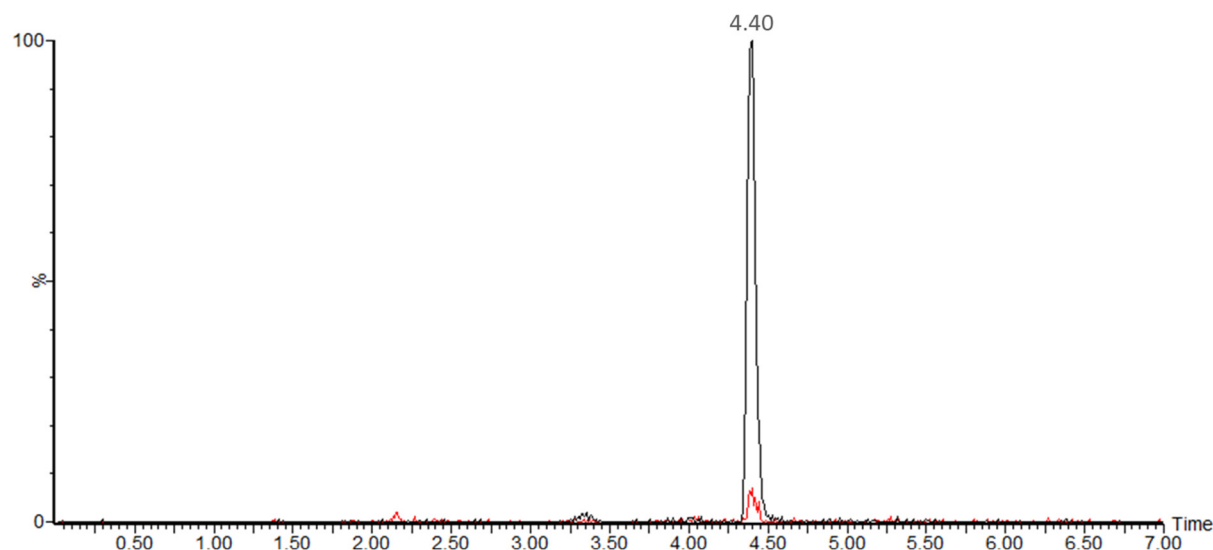

**Extended Data Figure S2. LC-MS/MS chromatogram of 6mA levels in the mtDNA isolated from nematodes at adult stages of days 1 and 7.** Figure shows the selected ion chromatograms of  $m/z$  150.08 from the MS/MS fragmentation of  $m/z$  266.1 at a transfer collision energy of 17V. mtDNA was isolated from genomic samples. The young sample at adult age of day 1 (red line) shows basal (“noise”) levels of 6mA (0.55 fmol/1000 ng DNA). The aged sample at adult age of day 7 (black line) displays much higher 6mA levels (3.81 fmol/1000 ng DNA). Optimized settings of the Waters Select Series IMS mass spectrometer used for the LC-MS/MS detection of 6mA were as follows:

Capillary voltage: 2.80 kV

Cone voltage: 20 V

Source offset: 30 V

Source temperature: 120 °C

Cone gas flow: 20 L/hour

Desolvation gas flow: 800 L/hour

Desolvation temperature: 400 °C

Nebuliser gas flow: 6 bar

Body gradient: 10 V

Head gradient: 20 V

Ion guide 1 offset: 3.0 V

Ion guide 2 offset: 0.3 V

Quadrupole ion energy: 0.4 V

Pre-filter: 2.0 V

Trap CE: 6.0 V

Transfer CE: 17.0 V

Trap TW velocity: 300 m/s

Trap TW pulse height: 1.0 V

Trap Entrance: 2.0 V

Trap bias: 2.0 V  
Post Trap gradient: 1.0 V  
Post Trap bias: 35.0 V  
Collision gas: 3.5 ml/min  
StepWave RF: 200 V  
Ion guide RF: 300 V  
Transfer RF: 200 V  
Start mass: m/z 100  
End mass: m/z 280  
Scan time: 0.5 s  
Optic mode: V-Mode  
Polarity: Positive

**Extended Data Figure S3.**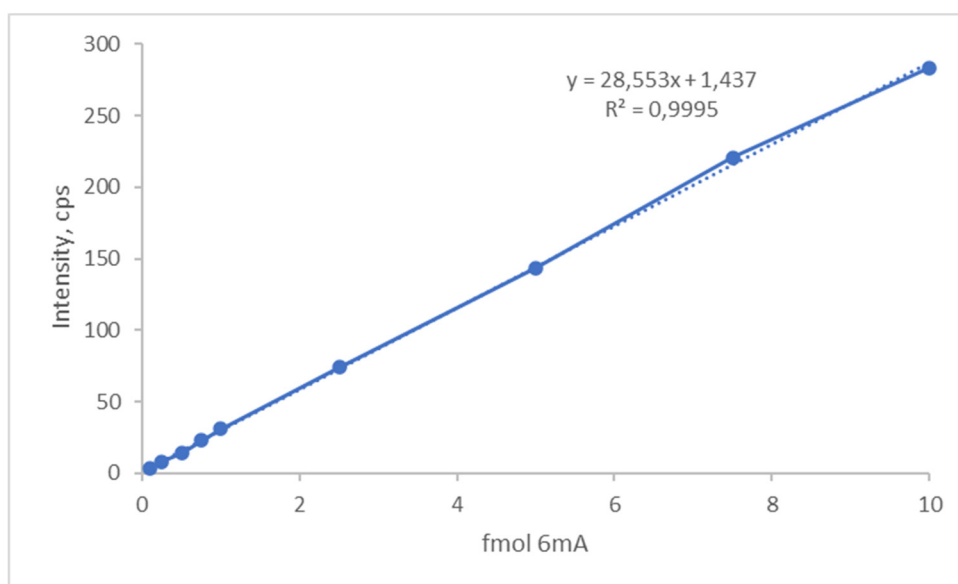

**Extended Data Figure S3. Calibration of the LC-MS/MS analysis.** Linear calibration between 0.1 amol and 10 fmol was applied using synthetic 6mA. Intensity measured in counts per second (cps). For calibration we used the linear regression method. The dotted line indicates the regression line, where a good correlation ( $R^2 > 0,999$ ) was observed.  $R^2$  is the square of the correlation, it measures the proportion of variation in the dependent variable that can be attributed to the independent variable.

**Extended Figure S4.**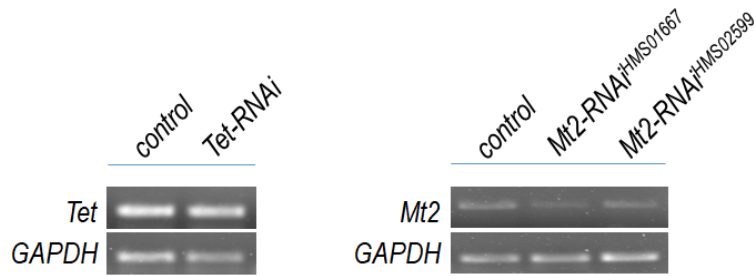

**Extended Data Figure S4. Transcript levels in *Tet*-RNAi and *Mt2*-RNAi flies.** *Drosophila* RNAi strains containing UAS responder lines were crossed with *Tub-Gal4* driver lines. *GAPDH* was used as an internal control. Control strain refers to *w1118* genotype. *Tet*-RNAi did not decrease *Tet* transcript levels. The RNAi construct is miRNA-based, so it can cause a translational block. Animals were maintained at 25°C. Both *Mt2*-RNAi constructs significantly decreased *Mt2* transcript levels. Animals were kept at 29°C.

Extended Data Table S1. Statistical data.

| Background                     | Primer          | Adult age (days) | Trials | Mean of relative 6mA level | ±SD   | One -way ANOVA with Tukey Post Hoc Test, P value | Significance level |
|--------------------------------|-----------------|------------------|--------|----------------------------|-------|--------------------------------------------------|--------------------|
| Figure 2                       |                 |                  |        |                            |       |                                                  |                    |
| <i>C. elegans</i> wild-type    | <i>Ce_mito3</i> | 1                | 3      | 1.000                      | 0.344 | control                                          |                    |
|                                |                 | 4                | 3      | 2.589                      | 0.490 | vs. 1. day P=0.0041                              | **                 |
|                                |                 | 7                | 3      | 4.593                      | 0.178 | vs. 4. day P=0.0057                              | **                 |
|                                |                 | 9                | 3      | 5.820                      | 0.092 | vs. 7. day P=0.1238                              | NS                 |
|                                |                 | 12               | 3      | 7.636                      | 0.136 | vs. 9. day P=0.0137                              | *                  |
|                                | <i>Ce_mito4</i> | 1                | 3      | 1.000                      | 0.119 | control                                          | -                  |
|                                |                 | 4                | 3      | 3.033                      | 0.259 | vs. 1. day P<0.001                               | ***                |
|                                |                 | 7                | 3      | 4.955                      | 0.152 | vs. 4. day P<0.001                               | ***                |
|                                |                 | 9                | 3      | 6.448                      | 0.201 | vs. 7. day P<0.001                               | ***                |
|                                |                 | 12               | 3      | 7.902                      | 0.232 | vs. 9. day P<0.001                               | ***                |
| Figure 2                       |                 |                  |        |                            |       |                                                  |                    |
| <i>C. elegans</i> <i>daf-2</i> | <i>Ce_mito3</i> | 1                | 3      | 1.000                      | 0.149 | control                                          | -                  |
|                                |                 | 4                | 3      | 2.525                      | 0.938 | vs. 1. day P=0.2158                              | NS                 |
|                                |                 | 9                | 3      | 3.655                      | 1.043 | vs. 4. day P=0.4934                              | NS                 |
|                                |                 | 12               | 3      | 5.101                      | 0.770 | vs. 9. day P=0.2589                              | NS                 |
|                                |                 | 16               | 3      | 6.920                      | 0.712 | vs. 12. day P=0.1040                             | NS                 |
|                                |                 | 20               | 3      | 8.258                      | 0.644 | vs. 16. day P=0.1040                             | NS                 |
|                                | <i>Ce_mito4</i> | 1                | 3      | 1.000                      | 0.566 | control                                          |                    |
|                                |                 | 4                | 3      | 2.414                      | 0.402 | vs. 1. day P=0.0026                              | **                 |
|                                |                 | 9                | 3      | 4.340                      | 0.326 | vs. 4. day P=0.0008                              | ***                |
|                                |                 | 12               | 3      | 5.254                      | 0.289 | vs. 9. day P=0.0038                              | **                 |
|                                |                 | 16               | 3      | 7.193                      | 0.583 | vs. 16. day P=0.0205                             | *                  |
| Figure 4A'                     |                 |                  |        |                            |       |                                                  |                    |
| <i>D. melanogaster</i>         | <i>Dm_mito2</i> | 1                | 5      | 1.000                      | 0.086 | -                                                | -                  |
|                                |                 | 10               | 5      | 4.351                      | 0.621 | vs. 1. day P=0.0019                              | **                 |

|            |                 |                   |        |                            |       |                                                  |                    |
|------------|-----------------|-------------------|--------|----------------------------|-------|--------------------------------------------------|--------------------|
|            |                 | 20                | 5      | 7.001                      | 1.175 | vs. 10. day<br>P=0.0156                          | *                  |
|            |                 | 30                | 5      | 25.394                     | 1.939 | vs. 20. day<br>P<0.0001                          | ***                |
|            |                 | 40                | 5      | 8.470                      | 1.211 | vs. 30. day<br>P<0.0001                          | ***                |
|            | <i>Dm_mito4</i> | 1                 | 2      | 1.000                      | 0.064 | -                                                | -                  |
|            |                 | 10                | 2      | 2.041                      | 1.174 | -                                                | -                  |
|            |                 | 20                | 2      | 3.621                      | 0.860 | -                                                | -                  |
|            |                 | 30                | 2      | 10.029                     | 0.069 | -                                                | -                  |
|            |                 | 40                | 2      | 4.962                      | 0.135 | -                                                | -                  |
| Figure 5B  |                 |                   |        |                            |       |                                                  |                    |
| Background | Primer          | Adult age (years) | Trials | Mean of relative 6mA level | ±SD   | One -way ANOVA with Tukey Post Hoc Test, P value | Significance level |
| dog        | <i>Cl_mito2</i> | 1                 | 3      | 1.000                      | 0.245 | -                                                | -                  |
|            |                 | 4                 | 6      | 2.521                      | 0.278 | vs. 1. year<br>P<0.001                           | ***                |
|            |                 | 7                 | 3      | 3.315                      | 0.365 | vs. 4. year<br>P=0.007                           | **                 |
|            |                 | 12                | 3      | 5.358                      | 0.327 | vs. 7. year<br>P<0.001                           | ***                |
|            |                 | 15                | 6      | 5.233                      | 0.208 | vs. 12. year<br>P=0.965                          | NS                 |
| Figure 5B  |                 |                   |        |                            |       |                                                  |                    |
| dog        | <i>Cl_mito2</i> | 1                 | 3      | 0.650                      | 0.366 | control                                          | -                  |
|            |                 | 3                 | 3      | 2.189                      | 0.940 | vs. 1. year<br>P=0.008                           | **                 |
|            |                 | 4                 | 3      | 3.244                      | 0.426 | vs. 3. year<br>P=0.002                           | **                 |
|            |                 | 7                 | 3      | 4.507                      | 0.887 | vs. 4. year<br>P=0.005                           | **                 |
|            |                 | 9                 | 3      | 5.356                      | 0.572 | vs. 7. Year<br>P<0.001                           | ***                |
|            |                 | 10                | 3      | 6.265                      | 0.280 | vs.9. year P<0.001                               | ***                |
|            |                 | 11                | 3      | 6.500                      | 0.586 | vs. 10. year<br>P=0.009                          | **                 |
|            |                 | 12                | 3      | 6.675                      | 1.120 | vs. 11. year<br>P=0.003                          | ***                |
|            |                 | 15                | 3      | 4.065                      | 1.202 | vs. 12. year<br>P=0.856                          | NS                 |
| Figure 5B  |                 |                   |        |                            |       |                                                  |                    |

| Background | Primer          | Adult age                   | Mean of relative 6mA level | ±SD   | Independent T-test (with Levene's test), P value | Significance level |
|------------|-----------------|-----------------------------|----------------------------|-------|--------------------------------------------------|--------------------|
| dog        | <i>Cl_mito2</i> | young group (1 and 4 years) | 2.028                      | 1.065 | control                                          | -                  |
|            |                 | old group (12 and 15 years) | 5.747                      | 1.191 | vs. control<br>P=0.0025                          | **                 |

Extended Data Table S2. Statistical data for Figure 3.

| Background        | Adult age (days) | Trials | 6mA level (fmol/1000ng) | ±SD | Statistic | Significance level |
|-------------------|------------------|--------|-------------------------|-----|-----------|--------------------|
| <b>Figure 3</b>   |                  |        |                         |     |           |                    |
| <i>C. elegans</i> | 1                | 1      | 0.55                    | -   | -         | -                  |
|                   | 7                | 1      | 3.81                    | -   | -         | -                  |
